# Supplementary material
Source: publisher site journal article supplement (https://www.dovepress.com/article/395903)
Supplement: Supplementary file 1 [file get_supplementary_file.php]

**Table S1 Tumor response to the first cTACE among different pathological types according to mRESCIST in recurrence after surgical resection cohort.**

| Tumor response | MTM | Non-MTM | P | VETC | Non-VETC | P | CK19-positive | CK19-negative | P |
| --- | --- | --- | --- | --- | --- | --- | --- | --- | --- |
| CR+PR | 11 | 13 | 0.773 | 15 | 9 | **0.000*** | 2 | 22 | **0.004*** |
| SD+PD | 17 | 22 |  | 9 | 30 |  | 15 | 24 |  |
| Total | 28 | 35 |  | 24 | 39 |  | 17 | 46 |  |

**Table S2 Lipiodol deposition to the first cTACE among different pathological types according to mRESCIST in recurrence after surgical resection cohort.**

| Lipdiodol deposition | MTM | Non-MTM | P | VETC | Non-VETC | P | CK19-positive | CK19-negative | P |
| --- | --- | --- | --- | --- | --- | --- | --- | --- | --- |
| ≥50% | 18 | 14 | **0.043*** | 18 | 13 | **0.001*** | 4 | 27 | **0.031*** |
| <50% | 10 | 21 |  | 16 | 26 |  | 13 | 19 |  |
| Total | 28 | 35 |  | 24 | 39 |  | 17 | 46 |  |

**Table S3 Tumor response to the first cTACE among different pathological types according to mRESCIST in liver biopsy cohort.**

| Tumor response | MTM | Non-MTM | P | VETC | Non-VETC | P | CK19-positive | CK19-negative | P |
| --- | --- | --- | --- | --- | --- | --- | --- | --- | --- |
| CR+PR | 21 | 32 | 0.955 | 29 | 24 | **0.003*** | 5 | 48 | **0.000*** |
| SD+PD | 25 | 48 |  | 19 | 54 |  | 30 | 43 |  |
| Total | 46 | 80 |  | 48 | 78 |  | 35 | 91 |  |

**Table S4 Lipiodol deposition after the first cTACE among different pathological types according to mRESCIST in liver biopsy cohort.**

| Lipdiodol deposition | MTM | Non-MTM | P | VETC | Non-VETC | P | CK19-positive | CK19-negative | P |
| --- | --- | --- | --- | --- | --- | --- | --- | --- | --- |
| ≥50% | 24 | 33 | 0.159 | 30 | 27 | **0.002*** | 8 | 49 | **0.001*** |
| <50% | 22 | 47 |  | 18 | 51 |  | 27 | 42 |  |
| Total | 46 | 80 |  | 48 | 78 |  | 35 | 91 |  |

**Table S5 Ki67, AFP and GPC3 expression in HCC tissues among different pathological types.**

| Variables | MTM  n=72 | Non-MTM  n=117 | P | VETC  n=76 | Non-VETC  n=113 | P | CK19-positive  N=52 | CK19-negative  n=137 | P |
| --- | --- | --- | --- | --- | --- | --- | --- | --- | --- |
| AFP-positive | 27 | 8 | **0.000*** | 19 | 16 | **0.024*** | 12 | 23 | 0.214 |
| Ki67-positive | 36 | 54 | 0.537 | 35 | 55 | 0.476 | 22 | 68 | 0.231 |
| GPC3-positive | 45 | 65 | 0.496 | 44 | 66 | 0.315 | 28 | 82 | 0.276 |

**Table S6 Univariate and multivariate analyses of pathological types for ORR of the second cTACE treatment by Logistic Regression Analysis in the whole cohort.**

| Variable | Univariable OR[95% CI] | P | Multivariable OR[95% CI] | P |
| --- | --- | --- | --- | --- |
| VETC | 3.86[1.49,10.04] | **0.006✳** | 3.31[1.24,8.83] | **0.017✳** |
| MTM | 1.83[0.72,4.64] | 0.203 | 1.42[0.53,3.82] | 0.491 |
| CK19-positive | 0.22[0.03,1.87] | 0.167 | 0.34[0.04,3.03] | 0.334 |

**
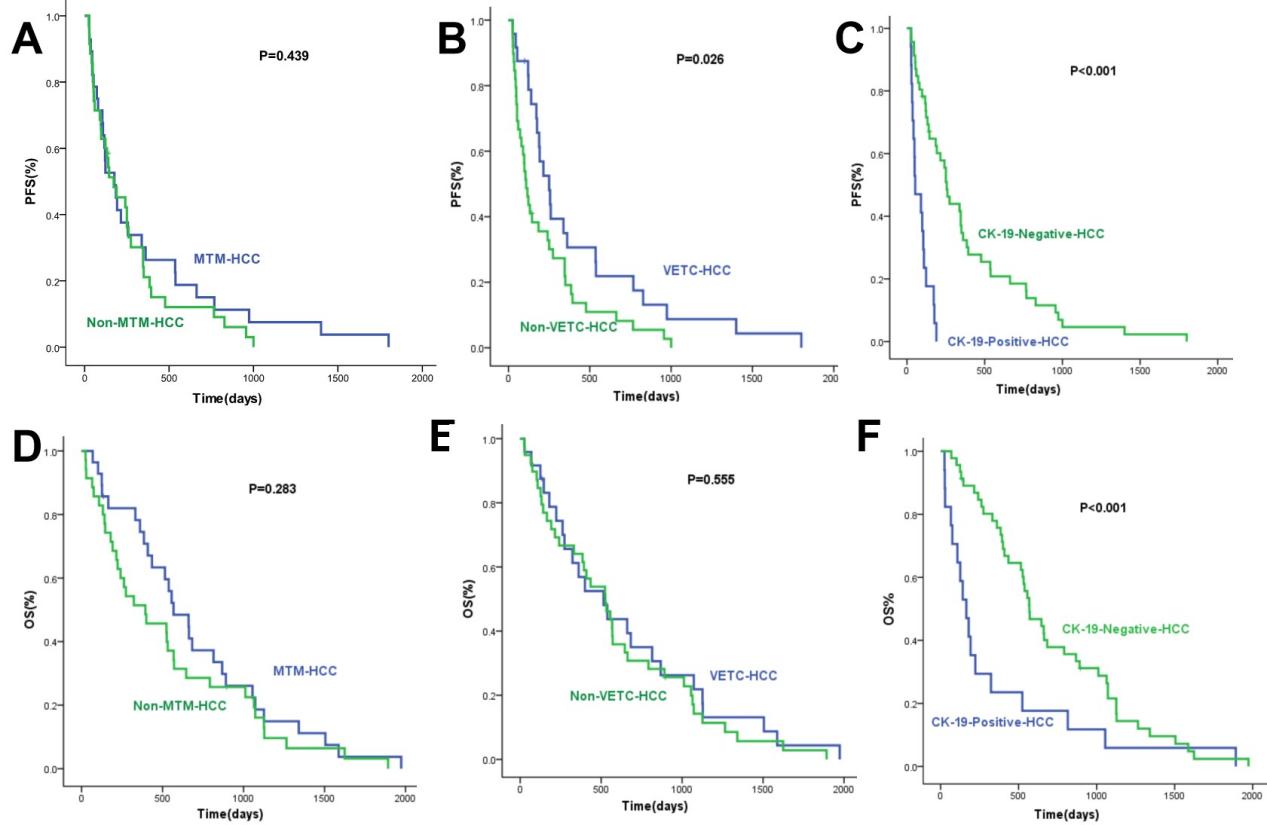
**

**Figure S1** PFS and OS among different pathological types in recurrence after surgical resection cohort. A and B, cTACE therapy prolongs PFS of VETC-HCCs but not MTM-HCCs; C, CK-19-positive HCCs resist to cTACE therapy; D, E and F, OS of VETC and non-VETC, MTM and non-MTM HCCs were not significantly different, but CK-19-negative HCCs derive a significant survival benefit compared with CK-19-positive HCCs.


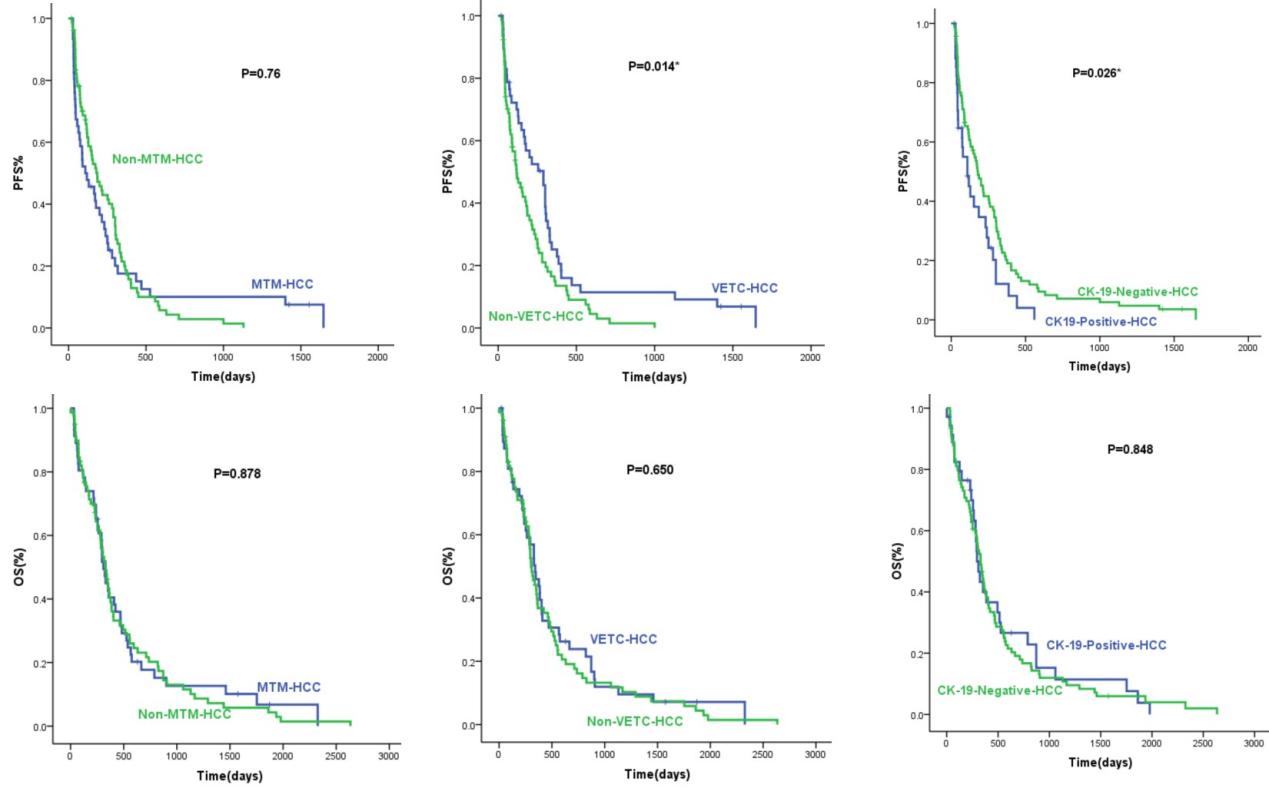


**Figure S2** PFS and OS among different pathological types in liver needle biopsy cohort. A and B, cTACE therapy prolongs PFS of VETC but not MTM-HCCs; C, CK-19-positive HCCs resist to cTACE therapy; D, E and F, OS of VETC and non-VETC, MTM and non-MTM, CK-19-positive and CK-19-negative HCCs were not significantly different.
